# Supplementary material for: Novel functions of Noggin proteins: inhibition of Activin/Nodal and Wnt signaling
Source: Oxford University Press journal article supplement (doi:10.1242/dev.068908), 2011-11-10
Supplement: dev068908tables1.pdf [file dev068908tables1.pdf]

Table S1. Cloning strategies of constructs

| DNA constructs            | PCR primers and cloning strategy used to prepare expression plasmids                                                                                                                                                                                                                                                                                                                                                                                                                                                                                                                                                                                                                                                                                                                                      |
|---------------------------|-----------------------------------------------------------------------------------------------------------------------------------------------------------------------------------------------------------------------------------------------------------------------------------------------------------------------------------------------------------------------------------------------------------------------------------------------------------------------------------------------------------------------------------------------------------------------------------------------------------------------------------------------------------------------------------------------------------------------------------------------------------------------------------------------------------|
| <i>pNog2-EGFP</i>         | 1 <sup>st</sup> step. Obtaining of 4172 bp DNA fragment including 5'UTR and 5'non-coding region of <i>Noggin2</i> gene by two rounds of nested PCR from <i>Xenopus tropicalis</i> genomic DNA with the following two pairs of primers: 5'-GGTTAATAAGGCTTGCTGAAC and 5'-CTCAGGCAGATTATCCTCTTC (26 cycles); 5'-TAACGTCGACATAGCTGCCGATCAGTAGGTC and 5'-ATCCACCGGTGATGTTCAACCCCTTCAATG (15 cycles).<br>2 <sup>nd</sup> step. Cloning into <i>Sall</i> / <i>AgeI</i> sites of <i>pEGFP</i> plasmid (Clontech). Checking by sequencing.                                                                                                                                                                                                                                                                         |
| <i>pNog2-tALK4</i>        | 1 <sup>st</sup> step. Obtaining of <i>tALK4</i> cDNA fragment from gastrula first-strand total cDNA with primers: 5'-ATATACCGGTGCCACCATGGCGGAGCTACCGCCTT and 5'-AATGCGGCCGCTCA GATAGTTCTCGCCACAGT.<br>2 <sup>nd</sup> step. Cloning instead of <i>EGFP</i> into <i>AgeI</i> / <i>NotI</i> sites of <i>pNog2-EGFP</i> . Checking by sequencing.                                                                                                                                                                                                                                                                                                                                                                                                                                                            |
| <i>pNog2-tBR</i>          | 1 <sup>st</sup> step. Obtaining of <i>tBR</i> cDNA fragment from <i>ptBR</i> with primers: 5'-AATAACCGGTGCCACCATGAGAGAACGACTTTTCATTG and 5'-AATGCGGCCGCTTATTTGTAAATCCATATGATAAGA .<br>2 <sup>nd</sup> step. Cloning instead of <i>EGFP</i> into <i>AgeI</i> / <i>NotI</i> sites of <i>pNog2-EGFP</i> . Checking by sequencing.                                                                                                                                                                                                                                                                                                                                                                                                                                                                            |
| <i>pNog2-Dkk</i>          | 1 <sup>st</sup> step. Obtaining of <i>Dkk1</i> cDNA from gastrula first-strand total cDNA with primers: 5'-AATAACCGGTGCCACCATGGGCAGCAACATGTT and 5'-AATGCGGCCGCTTAGTGCTTTGGCAAGTGTGA.<br>2 <sup>nd</sup> step. Cloning instead of <i>EGFP</i> into <i>AgeI</i> / <i>NotI</i> sites of <i>pNog2-EGFP</i> . Checking by sequencing.                                                                                                                                                                                                                                                                                                                                                                                                                                                                         |
| <i>pXanfActB-CardKate</i> | To construct double-cassette vector <i>pXanfActB-CardKate</i> , <i>Otx2</i> cDNA in <i>pXanf1-Otx2-CardKate</i> (Ermakova et al., 2007) was swapped by <i>AgeI</i> and <i>NotI</i> with <i>ActivinβB</i> cDNA (see below)                                                                                                                                                                                                                                                                                                                                                                                                                                                                                                                                                                                 |
| Synthetic mRNA            | PCR primers and cloning strategy used to prepare DNA templates for generation of synthetic mRNA                                                                                                                                                                                                                                                                                                                                                                                                                                                                                                                                                                                                                                                                                                           |
| <i>Noggin1Δ5</i>          | 1 <sup>st</sup> step. PCR from <i>pNogginΔ5</i> with forward primer 'Ng1 Δ5': 5'-ATAACCGGTGAATTCCTCTCTGATGCAT and reverse primer 'Ng1 stop': 5'-ATTCTCGAGCTTCAGCATGAGCATTTGCA. Here and below restriction sites are underlined, start and stop codons are framed.<br>2 <sup>nd</sup> step. Cloning by <i>AgeI</i> (blunted) and <i>XhoI</i> into <i>BamHI</i> (blunted) and <i>XhoI</i> of <i>pCS2</i> plasmid; checking by sequencing.<br>Final construct: <i>pCS2-Noggin1Δ5</i> .                                                                                                                                                                                                                                                                                                                       |
| <i>Noggin2Δ5</i>          | 1 <sup>st</sup> step. PCR from <i>pBluescriptNoggin2</i> with forward primer 'Ng2 Δ5': 5'-ATAACCGGTGAATCTAACGATCTGTAACCTATTG and reverse primer 'Ng2 stop': 5'-ATTCTCGAGCTTCAGCATGAACACTTACACTCTG.<br>2 <sup>nd</sup> step. Cloning by <i>AgeI</i> (blunted) and <i>XhoI</i> into <i>BamHI</i> (blunted) and <i>XhoI</i> of <i>pCS2</i> plasmid; checking by sequencing.<br>Final construct: <i>pCS2-Noggin2Δ5</i> .                                                                                                                                                                                                                                                                                                                                                                                      |
| <i>SynNoggin1</i>         | 1 <sup>st</sup> step. PCR from <i>pNogginΔ5</i> with forward primer 'Ng1 synt 5' (Kozak site is in italics): 5'-AATTACCGGTGCCACCATGATGATATCCAGTGCC and 'Ng1 stop'.<br>2 <sup>nd</sup> step. Cloning by <i>AgeI</i> (blunted) and <i>XhoI</i> into <i>BamHI</i> (blunted) and <i>XhoI</i> of <i>pCS2</i> plasmid; checking by sequencing.<br>Final construct: <i>pCS2-SynNoggin1</i> .                                                                                                                                                                                                                                                                                                                                                                                                                     |
| <i>SynNoggin2</i>         | 1 <sup>st</sup> step. PCR from <i>pBluescriptNoggin2</i> with forward primer 'Ng2 synt 5' (Kozak site is in italics): 5'-AATTACCGGTGCCACCATGAAGAGGATAAATCTGC and 'Ng2 stop'.<br>2 <sup>nd</sup> step. Cloning by <i>AgeI</i> (blunted) and <i>XhoI</i> into <i>BamHI</i> (blunted) and <i>XhoI</i> of <i>pCS2</i> plasmid; checking by sequencing.<br>Final construct: <i>pCS2-SynNoggin2</i> .                                                                                                                                                                                                                                                                                                                                                                                                           |
| <i>ΔclipNoggin1</i>       | 1 <sup>st</sup> step. Obtaining of 5' fragment of <i>ΔclipNoggin1</i> cDNA. PCR from <i>pNogginΔ5</i> with 'Ng1 synt 5' and 5'-CTTCTCCTTGGGATAATGTTGGCAACCCCTT.<br>2 <sup>nd</sup> step. Obtaining of 3' fragment of <i>ΔclipNoggin1</i> cDNA. PCR from <i>pNogginΔ5</i> with 5'-TTGCCAACATTATCCCAAGGAGAAGGATCTTA and 'Ng1 stop'.<br>3 <sup>rd</sup> step. Two overlapping cDNA fragments obtained at the previous two steps were purified from non-incorporated primers, mixed, denatured, annealed and subjected to PCR with 'Ng1 synt 5' and 'Ng1 stop' primers.<br>4 <sup>th</sup> step. Cloning by <i>AgeI</i> (blunted) and <i>XhoI</i> into <i>BamHI</i> (blunted) and <i>XhoI</i> of <i>pCS2</i> plasmid; checking by sequencing.<br>Final construct: <i>pCS2-ΔclipNoggin1</i> .                  |
| <i>ΔclipNoggin2</i>       | 1 <sup>st</sup> step. Obtaining of 5' fragment of <i>ΔclipNoggin2</i> cDNA. PCR from <i>pBluescriptNoggin2</i> with 'Ng2 synt 5' and -CTGCTCCTTGGGATAAGGCTGACAGCACCCCT.<br>2 <sup>nd</sup> step. Obtaining of 3' fragment of <i>ΔclipNoggin2</i> cDNA. PCR from <i>pBluescriptNoggin2</i> with 5'-CTGTCAGCCTTATCCAAAGGAGCAGGATCTGG and 'Ng2 stop'.<br>3 <sup>rd</sup> step. Two overlapping cDNA fragments obtained at the previous two steps were purified from non-incorporated primers, mixed, denatured, annealed and subjected to PCR with 'Ng2 synt 5' and 'Ng2 stop' primers.<br>4 <sup>th</sup> step. Cloning by <i>AgeI</i> (blunted) and <i>XhoI</i> into <i>BamHI</i> (blunted) and <i>XhoI</i> of <i>pCS2</i> plasmid; checking by sequencing.<br>Final construct: <i>pCS2-ΔclipNoggin2</i> . |
| <i>misMONoggin2</i>       | 1 <sup>st</sup> step. PCR from <i>pBluescriptNoggin2</i> with 'Ng2 stop' and the mixture (ratio of 1:10 pM, respectively) of 'Ng1 synt 5' and <i>Noggin1</i> / <i>Noggin2</i> adaptor primer 5'-GATCATTCAGTGCCTTGACTTTTGTCTTGCTGTG ( <i>Noggin1</i> sequence is underlined, <i>Noggin2</i> sequence is in italic).<br>2 <sup>nd</sup> step. Cloning by <i>AgeI</i> (blunted) and <i>XhoI</i> into <i>BamHI</i> (blunted) and <i>XhoI</i> of <i>pCS2</i> plasmid; checking by sequencing.<br>Final construct: <i>pCS2-misMONoggin2</i> .                                                                                                                                                                                                                                                                   |
| <i>misMOΔclipNoggin2</i>  | The same PCR strategy was utilized as was used to generate <i>pCS2-misMONoggin2</i> except <i>pCS2-ΔclipNoggin2</i> was taken as a template for PCR.<br>Final construct: <i>pCS2-misMOΔclipNoggin2</i> .                                                                                                                                                                                                                                                                                                                                                                                                                                                                                                                                                                                                  |
| <i>MycNoggin1Δ5</i>       | 1 <sup>st</sup> step. Obtaining of 5' fragment of <i>MycNoggin1Δ5</i> cDNA. PCR from <i>pNogginΔ5</i> with 'Ng1 Δ5' and a mixture of two reverse primers taken in ratio of 1:10 pM respectively: 5'-CAGATCCTCTTCAGAGATGAGTTTCTGCTCATAATGTTGGCAACCCCTTG ('Ng1 Myc rev') and 5'-GAGGTCTTCTTCGATATCAGCTTCTGTTCCAGATCCTCTTCAGAGATG ('Myc rev'). here and below Myc-tag coding sequences are underlined by dotted line.<br>2 <sup>nd</sup> step. Obtaining of 3' fragment of <i>MycNoggin1Δ5</i> cDNA. PCR from <i>pNogginΔ5</i> with 'Ng1 stop' and a mixture of two forward primers taken in ratio of 1:10 pM respectively (Myc-tag coding sequences are underlined): 5'-GAGCAGAAACTCATCTCTGAAGAGGATCTGCTGCACATCAGACCGG CT ('Ng1 Myc forw') and                                                              |

|                                          |                                                                                                                                                                                                                                                                                                                                                                                                                                                                                                                                                                                                                                                                                                                                                                                                                                                                                                                                                                                                                                                                                                                                                                                                                                                                  |
|------------------------------------------|------------------------------------------------------------------------------------------------------------------------------------------------------------------------------------------------------------------------------------------------------------------------------------------------------------------------------------------------------------------------------------------------------------------------------------------------------------------------------------------------------------------------------------------------------------------------------------------------------------------------------------------------------------------------------------------------------------------------------------------------------------------------------------------------------------------------------------------------------------------------------------------------------------------------------------------------------------------------------------------------------------------------------------------------------------------------------------------------------------------------------------------------------------------------------------------------------------------------------------------------------------------|
|                                          | <p>5'-GAACAGAAGCTGATATCGGAGGAAGACCTCGAGCAGAAACTCATCTCTG ('Myc forw').</p> <p>3<sup>rd</sup> step. Obtaining of cDNA encoding full <i>Noggin</i><math>\Delta</math>5 with three copies of Myc-tag epitop behind signal peptide cleavage site (see Fig. 2A). Two overlapping cDNA fragments obtained at the previous two steps were purified from non-incorporated primers, mixed, denatured, annealed and subjected to PCR with 'Ng1 <math>\Delta</math>5' and 'Ng1 stop' primers.</p> <p>4<sup>th</sup> step. Cloning by AgeI (blunted) and XhoI into BamHI (blunted) and XhoI of pCS2 plasmid; checking by sequencing.</p> <p>Final construct: <i>pCS2-MycNoggin1<math>\Delta</math>5</i>.</p>                                                                                                                                                                                                                                                                                                                                                                                                                                                                                                                                                                  |
| <i>MycNoggin2<math>\Delta</math>5</i>    | <p>1<sup>st</sup> step. Obtaining of 5' fragment of <i>MycNoggin2<math>\Delta</math>5</i> cDNA. PCR from <i>pBluescriptNoggin2</i> with 'Ng2 <math>\Delta</math>5' and a mixture of two reverse primers taken in ratio of 1:10 pM respectively: 5'-<br/> CAGATCCTCTTCAGAGATGAGTTCTGCTCATAAGGCTGACAGCACCCCTGA ('Ng2 Myc rev') and 'Myc rev'.</p> <p>2<sup>nd</sup> step. Obtaining of 3' fragment of <i>MycNoggin2<math>\Delta</math>5</i> cDNA. PCR with 'Ng1 stop' and a mix of two forward primers taken in ratio of 1:10 pM respectively:<br/> 5'-AGCAGAAACTCATCTCTGAAGAGGATCTGCTCAGGCTTAGACCCTCT ('Ng2 Myc forw') and 'Myc forw'.</p> <p>3<sup>rd</sup> step. Obtaining of cDNA encoding full <i>Noggin2<math>\Delta</math>5</i> with three copies of Myc-tag epitop behind signal peptide cleavage site (see Fig. 2A). Two overlapping cDNA fragments obtained at the previous two steps were purified from non-incorporated primers, mixed, denatured, annealed and subjected to PCR with 'Ng2 <math>\Delta</math>5' and 'Ng2 stop' primers.</p> <p>4<sup>th</sup> step. Cloning by AgeI (blunted) and XhoI into BamHI (blunted) and XhoI of pCS2 plasmid; checking by sequencing.</p> <p>Final construct: <i>pCS2-MycNoggin2<math>\Delta</math>5</i>.</p> |
| <i>wtMycNoggin1</i>                      | <p>The same PCR-based strategy was utilized as was used for preparing <i>MycNoggin1<math>\Delta</math>5</i> cDNA (see above), except <i>pNoggin A3</i> plasmid and different forward primer was used for obtaining of 5' fragment of <i>wtMycNoggin1</i> cDNA: (Ng1 wt5') 5'-ATAACCGGTTAATAAATCTAAGTAGCCAGA.</p> <p>Final construct: <i>pCS2-wtMycNoggin1</i>.</p>                                                                                                                                                                                                                                                                                                                                                                                                                                                                                                                                                                                                                                                                                                                                                                                                                                                                                               |
| <i>wtMycNoggin2</i>                      | <p>The same PCR-based strategy was utilized as was used for preparing <i>MycNoggin1<math>\Delta</math>5</i> cDNA (see above), except <i>pBluescript-wtNoggin2</i> and different forward primer was used for obtaining of 5' fragment of <i>wtMycNoggin2</i> cDNA: (Ng2 wt5') 5'-ATAACCGGTTGATTCTGCCTTACTTACTGACACA.</p> <p>Final construct: <i>pCS2-wtMycNoggin2</i>.</p>                                                                                                                                                                                                                                                                                                                                                                                                                                                                                                                                                                                                                                                                                                                                                                                                                                                                                        |
| <i>SynMycNoggin1</i>                     | <p>1<sup>st</sup> step. PCR from <i>pCS2-MycNoggin1<math>\Delta</math>5</i> with primers 'Ng1 synt 5' and 'Ng1 stop'.</p> <p>2<sup>nd</sup> step. Cloning by AgeI (blunted) and XhoI into BamHI (blunted) and XhoI of pCS2 plasmid; checking by sequencing.</p> <p>Final construct: <i>pCS2-SynMycNoggin1</i>.</p>                                                                                                                                                                                                                                                                                                                                                                                                                                                                                                                                                                                                                                                                                                                                                                                                                                                                                                                                               |
| <i>SynMycNoggin2</i>                     | <p>1<sup>st</sup> step. PCR from <i>pCS2-MycNoggin2<math>\Delta</math>5</i> with primers 'Ng2 synt 5' and 'Ng2 stop'.</p> <p>2<sup>nd</sup> step. Cloning by AgeI (blunted) and XhoI into BamHI (blunted) and XhoI of pCS2 plasmid; checking by sequencing.</p> <p>Final construct: <i>pCS2-SynMycNoggin2</i>.</p>                                                                                                                                                                                                                                                                                                                                                                                                                                                                                                                                                                                                                                                                                                                                                                                                                                                                                                                                               |
| <i>Myc<math>\Delta</math>clipNoggin1</i> | <p>The same PCR strategy was utilized as was used to generate <i>MycNoggin1<math>\Delta</math>5</i>, except 'Ng1 synt 5' primer was taken instead of 'Ng1 <math>\Delta</math>5' and 5'-GAGCAGAAACTCATCTCTGAAGAGGATCTGCCCAAGGAGAAGGATCTTA ('<math>\Delta</math>-clip-Ng1 forw') was taken instead of 'Ng1 Myc forw'.</p> <p>Final construct: <i>pCS2-Myc<math>\Delta</math>clipNoggin1</i>.</p>                                                                                                                                                                                                                                                                                                                                                                                                                                                                                                                                                                                                                                                                                                                                                                                                                                                                   |
| <i>Myc<math>\Delta</math>clipNoggin2</i> | <p>The same PCR strategy was utilized as was used to generate <i>MycNoggin2<math>\Delta</math>5</i>, except 'Ng2 synt 5' primer was taken instead of 'Ng2 <math>\Delta</math>5' and 5'-GAGCAGAAACTCATCTCTGAAGAGGATCTGCCCAAGGAGAAGGATCTTA ('<math>\Delta</math>-clip-Ng1 forw') instead of 'Ng2 Myc forw'.</p> <p>Final construct: <i>pCS2-Myc<math>\Delta</math>clipNoggin2</i>.</p>                                                                                                                                                                                                                                                                                                                                                                                                                                                                                                                                                                                                                                                                                                                                                                                                                                                                             |
| <i>BMP4</i>                              | <p>1<sup>st</sup> step. Obtaining of cDNA encoding full BMP4. PCR from <i>Xenopus laevis</i> gastrula first strand cDNA with primers full BMP4 forward: 5'-AATTGGATCCGCCACCATGATCTCTGGTAACCGAA and stop BMP4 reverse: 5'-AATCTCGAGTCAACGGCACCCACACCTTCCA.</p> <p>2<sup>nd</sup> step. The obtained cDNA fragments was cloned into pCS2 plasmid either by BamHI and XhoI and correct clone was selected by sequencing.</p> <p>Final construct: <i>pCS2-BMP4</i>.</p>                                                                                                                                                                                                                                                                                                                                                                                                                                                                                                                                                                                                                                                                                                                                                                                              |
| <i>Xnr2</i>                              | <p>1<sup>st</sup> step. Obtaining of cDNA encoding full Xnr2. PCR from <i>Xenopus laevis</i> gastrula first strand cDNA with primers full Xnr2 forward: 5'-AATTGAATTCGCCACCATGCGCAAGCCTAGGATCATC and stop Xnr2 reverse: 5'-AATCTCGAGTCAATTACATCCACACTCATCCA.</p> <p>2<sup>nd</sup> step. Cloning of the obtained cDNA fragments was cloned into pCS2 plasmid either by EcoRI and XhoI and correct clone was selected by sequencing. Final construct: <i>pCS2-Xnr2</i>.</p>                                                                                                                                                                                                                                                                                                                                                                                                                                                                                                                                                                                                                                                                                                                                                                                       |
| <i>Xnr4</i>                              | <p>1<sup>st</sup> step. Obtaining of cDNA encoding full Xnr4. PCR from <i>Xenopus laevis</i> gastrula first strand cDNA with primers full Xnr4 forward: 5'-AATTGGATCCGCCACCATGATCATCTATACCTTTACTGTCT and stop Xnr4 reverse: 5'-AATCTCGAGTCACTGGCAGCCACACTCTTC.</p> <p>2<sup>nd</sup> step. The obtained cDNA fragments was cloned into pCS2 plasmid either by BamHI and XhoI and correct clone was selected by sequencing.</p> <p>Final construct: <i>pCS2-Xnr4</i>.</p>                                                                                                                                                                                                                                                                                                                                                                                                                                                                                                                                                                                                                                                                                                                                                                                         |
| <i>FlagActivinB</i>                      | <p>1<sup>st</sup> step. Obtaining of double-stranded cDNA fragment encoding three Flag epitops. Annealing 5'-TAAGTCGACTACAAAGACGATGATGACAAAGATTACAAGGATGACGACG and 5'-TAAGTCGAGTTTGTATCATCATCGTCTTTGTAGTCCTATCGTCGTCATCC (complementary sequences are in italics), filing of nested ends by Klenow fragment of DNA polymerase, restriction by Sall and XhoI.</p> <p>2<sup>nd</sup> step. Cloning of the obtained cDNA in XhoI site of <i>pSP64-ActivinB</i>. The resulting construct had a sequence encoding for three Flag-tag epitops located posterior to the Activin<math>\beta</math>B pre-proregion cleavage site (cleavage site is framed, Flag equences are underlined):...<u>RLDYKDDDDKDYKDDDDDKDYKDDDDK</u>LECDG...Importantly, in the resulting plasmid (<i>pSP64-Flag-ActivinB</i>), the region encoding for mature Activin<math>\beta</math>B was flanked from 3'-end by XhoI site which allowed us to generate Flag-tagged chimeric constructs, composed of the pre-proregion of Activin<math>\beta</math>B and the mature region of any desired TGF-beta factor.</p> <p>Final construct: <i>pSP64-FlagActivinB</i>.</p>                                                                                                                           |
| <i>FlagADMP</i>                          | <p>1<sup>st</sup> step. Obtaining of cDNA fragment encoding for mature part of ADMP. PCR from <i>Xenopus laevis</i> gastrula first strand cDNA with primers mature ADMP forward: 5'-ATTCTCGAGTCAGTAGAAGAAGATGGACAA and stop ADMP reverse: 5'-ATAGAATTCTTATGGGCACCCGACGT.</p> <p>2<sup>nd</sup> step. The obtained cDNA fragment was cloned into <i>pSP64-FlagActivinB</i> plasmid by XhoI and EcoRI instead of the</p>                                                                                                                                                                                                                                                                                                                                                                                                                                                                                                                                                                                                                                                                                                                                                                                                                                           |

|                       |                                                                                                                                                                                                                                                                                                                                                                                                                                                                                                                                                                                                                                                                                                                                                                                                                                                                                                                                    |
|-----------------------|------------------------------------------------------------------------------------------------------------------------------------------------------------------------------------------------------------------------------------------------------------------------------------------------------------------------------------------------------------------------------------------------------------------------------------------------------------------------------------------------------------------------------------------------------------------------------------------------------------------------------------------------------------------------------------------------------------------------------------------------------------------------------------------------------------------------------------------------------------------------------------------------------------------------------------|
|                       | fragment encoding mature ActivinB and checked by sequencing.<br>Final construct: <i>pSP64-FlagADMP</i> .                                                                                                                                                                                                                                                                                                                                                                                                                                                                                                                                                                                                                                                                                                                                                                                                                           |
| <i>FlagBMP4</i>       | 1 <sup>st</sup> step. Obtaining of cDNA fragment encoding for mature part of BMP4. PCR from <i>pCS2-BMP4</i> with primers mature BMP4 forward: 5'-AATCTCGAGCAGAGACCCGTAAAAAAAC and stop BMP4 reverse.<br>2 <sup>nd</sup> step. The obtained cDNA fragment was cloned into <i>pSP64-FlagActivinB</i> plasmid by XhoI and EcoRI (blunted) instead of the fragment encoding mature ActivinB and checked by sequencing.<br>Final construct: <i>pSP64-FlagBMP4</i> .                                                                                                                                                                                                                                                                                                                                                                                                                                                                    |
| <i>FlagXnr2</i>       | 1 <sup>st</sup> step. Obtaining of cDNA fragment encoding for mature part of Xnr2. PCR from <i>pCS2-Xnr2</i> with primers mature Xnr2 forward: 5'-TAACTCGAGATTGTCATGAACACCATCCCTC and stop Xnr2 reverse.<br>2 <sup>nd</sup> step. The obtained cDNA fragment was cloned into <i>pSP64-FlagActivinB</i> plasmid by XhoI and EcoRI (blunted) instead of the fragment encoding mature ActivinB and checked by sequencing.<br>Final construct: <i>pSP64-FlagXnr2</i> .                                                                                                                                                                                                                                                                                                                                                                                                                                                                 |
| <i>FlagXnr4</i>       | 1 <sup>st</sup> step. Obtaining of cDNA fragment encoding for mature part of BMP4. PCR from <i>pCS2-Xnr4</i> with primers mature Xnr4 forward: 5'-ATACTCGAGTTTAAGGAACATGTTATGGGT and stop Xnr4 reverse.<br>2 <sup>nd</sup> step. The obtained cDNA fragment was cloned into <i>pSP64-FlagActivinB</i> plasmid by XhoI and EcoRI (blunted) instead of the fragment encoding mature ActivinB and checked by sequencing.<br>Final construct: <i>pSP64-FlagXnr2</i> .                                                                                                                                                                                                                                                                                                                                                                                                                                                                  |
| <i>XWnt8</i>          | 1 <sup>st</sup> step. Obtaining of cDNA fragment encoding for mature part of BMP4. PCR from <i>pCSKA-XWnt8</i> first strand cDNA with primers XWnt8 forward: 5'-AATTGGATCCGCCACCATGCAAAACACCACTTTGTTCATC and XWnt8 reverse: 5'-ATGCATGCTCGAGTCATCTCCGGTGGCCTCT.<br>2 <sup>nd</sup> step. The obtained cDNA fragment was cloned into pCS2 plasmid by BamHI and XhoI and checked by sequencing.<br>Final construct: <i>pSP64-Xwnt8</i> .                                                                                                                                                                                                                                                                                                                                                                                                                                                                                             |
| <i>Xwnt8-Flag</i>     | 1 <sup>st</sup> step. Obtaining of <i>XWnt8</i> cDNA deprived of 3'-terminal stop-codon by PCR from <i>pCSKA-XWnt8</i> with primers XWnt8 forward and XWnt8 reverse: 5'-ATGCATGCTCATGATTCTCCGGTGGCCTCT.<br>2 <sup>nd</sup> step. The obtained cDNA fragment was cloned by EcoRV/BamHI (blunted) and NcoI/PagI sites into pCS4- 3Flag plasmid (gift from Dr Asashima) and checked by sequencing.<br>Final construct: <i>pSP64-Xwnt8-Flag</i> .                                                                                                                                                                                                                                                                                                                                                                                                                                                                                      |
| <i>SynNog2-Cer</i>    | Preparing of chimeric cDNA encoding for signaling peptide of Noggin2 and mature part of Cerberus.<br>1 <sup>st</sup> step. Obtaining of cDNA fragment encoding Noggn2 signal peptide by PCR from <i>pCS2-SynNoggin2</i> with primers 'Ng2 synt 5' and 5'-ATAAGGCTGACAGCACCCCT.<br>2 <sup>nd</sup> step. Obtaining of cDNA fragment encoding mature Cerberus by PCR from <i>pSP35-Cer</i> with primers 5'-AGGGGTGCTGTCAGCCTTACTCAGAACGACGAGAAAG and 5'-AATTCTCGAGTTAATGGTGCAGGAGTAGATGTAT ('Cer-stop').<br>3 <sup>rd</sup> step. Two overlapping cDNA fragments obtained at previous two steps were purified from non-incorporated primers, mixed, denatured, annealed and subjected to PCR with 'Ng2 synt 5' and 'Cer-stop' primers.<br>4 <sup>th</sup> step. Cloning by AgeI (blunted) and XhoI into BamHI (blunted) and XhoI sites of pCS2 plasmid. Checking by sequencing.<br>Final construct: <i>pCS2-SynNog2-Cer</i> .        |
| <i>SynMycNog2-Cer</i> | Preparing of chimeric cDNA encoding for signaling peptide of Noggin2 and mature part of Cerberus.<br>1 <sup>st</sup> step. Obtaining of cDNA fragment encoding Noggn2 signal peptide by PCR from <i>pCS2-SynMycNoggin2</i> with primers 'Ng2 synt 5' and 5'-CAGATCCTCTCAGAGATGAGTTTCTGCTCTAGGTCT.<br>2 <sup>nd</sup> step. Obtaining of cDNA fragment encoding mature Cerberus by PCR from <i>pSP35-Cer</i> with primers 5'-TCATCTCTGAAGAGGATCTGCACTCAGAACGACGAGAAAG and 'Cer-stop'.<br>3 <sup>rd</sup> step. Two overlapping cDNA fragments obtained at previous two steps were purified from non-incorporated primers, mixed, denatured, annealed and subjected to PCR with 'Ng2 synt 5' and 'Cer-stop' primers.<br>4 <sup>th</sup> step. Cloning by AgeI (blunted) and XhoI into BamHI (blunted) and XhoI sites of pCS2 plasmid. Checking by sequencing.<br>Final construct: <i>pCS2-SynMucNog2-Cer</i> .                       |
| <i>SynNog2-Fol</i>    | Preparing of chimeric cDNA encoding for signaling peptide of Noggin2 and mature part of Follistatin.<br>1 <sup>st</sup> step. Obtaining of cDNA fragment encoding Noggn2 signal peptide by PCR from <i>pCS2-SynNoggin2</i> with primers 'Ng2 synt 5' and 5'-ATAAGGCTGACAGCACCCCT.<br>2 <sup>nd</sup> step. Obtaining of cDNA fragment encoding mature Follistatin by PCR from <i>p64TNE-XFS319</i> with primers 5'-AGGGGTGCTGTCAGCCTTATAATTGCTGGCTGCAGCAGTC and 5'-ATTCTCGAGTCACTTACAGTTGCAAGAT ('Fol-stop').<br>3 <sup>rd</sup> step. Two overlapping cDNA fragments obtained at previous two steps were purified from non-incorporated primers, mixed, denatured, annealed and subjected to PCR with 'Ng2 synt 5' and 'Fol-stop' primers.<br>4 <sup>th</sup> step. Cloning by AgeI (blunted) and XhoI into BamHI (blunted) and XhoI sites of pCS2 plasmid. Checking by sequencing.<br>Final construct: <i>pCS2-SynNog2-Fol</i> . |
| <i>SynMycNog2-Fol</i> | Preparing of chimeric cDNA encoding for signaling peptide of Noggin2 and mature part of Follistatin.<br>1 <sup>st</sup> step. Obtaining of cDNA fragment encoding Noggn2 signal peptide by PCR from <i>pCS2-SynMycNoggin2</i> with primers 'Ng2 synt 5' and 5'-CAGATCCTCTCAGAGATGAGTTTCTGCTCTAGGTCT.<br>2 <sup>nd</sup> step. Obtaining of cDNA fragment encoding mature Follistatin by PCR from <i>p64TNE-XFS319</i> with primers 5'-TCATCTCTGAAGAGGATCTGAATTGCTGGCTGCAGCAGTC and 'Fol-stop'.<br>3 <sup>rd</sup> step. Two overlapping cDNA fragments obtained at previous two steps were purified from non-incorporated primers, mixed, denatured, annealed and subjected to PCR with 'Ng2 synt 5' and 'Fol-stop' primers.<br>4 <sup>th</sup> step. Cloning by AgeI (blunted) and XhoI into BamHI (blunted) and XhoI sites of pCS2 plasmid. Checking by sequencing.<br>Final construct: <i>pCS2-SynMycNog2-Fol</i> .             |
