# Supplementary material for: Novel functions of Noggin proteins: inhibition of Activin/Nodal and Wnt signaling
Source: Oxford University Press journal article supplement (doi:10.1242/dev.068908), 2011-11-10
Supplement: dev068908tables2.pdf [file dev068908tables2.pdf]

Table S2. Rescue of Noggin2 MO morphants by Wnt-, BMP- and Activin/Nodal-specific inhibitors

|    | misMONog2 +12<br>ng/μl pNog2-EGFP<br>(control) | MONog2 +12 ng/μl pNog2-EGFP | MONog2 +4 ng/μl pNog2-tALK4<br>+8 ng/μl pNog2-EGFP | MONog2 +12 ng/μl<br>pNog2-tALK4 | MONog2 +4 ng/μl<br>pNog2-tBR +8 ng/μl<br>pNog2-EGFP | MONog2 +12<br>ng/μl pNog2-<br>tBR | MONog2 +4<br>ng/μl pNog2-<br>Dkk1 +8 ng/μl<br>pNog2-EGFP | MONog2<br>+12 ng/μl<br>pNog2-<br>Dkk1 | MONog2 +4 ng/μl<br>pNog2-tALK4 +4<br>ng/μl pNog2-tBR<br>+4 ng/μl pNog2-<br>Dkk1 |
|----|------------------------------------------------|-----------------------------|----------------------------------------------------|---------------------------------|-----------------------------------------------------|-----------------------------------|----------------------------------------------------------|---------------------------------------|---------------------------------------------------------------------------------|
| 1  | 65,027                                         | 18,466                      | 51,276                                             | 0,469                           | 17,151                                              | 44,633                            | 56,892                                                   | 26,834                                | 44,829                                                                          |
| 2  | 34,832                                         | 45,217                      | 46,939                                             | 1,335                           | 42,062                                              | 25,158                            | 45,017                                                   | 53,418                                | 47,522                                                                          |
| 3  | 65,525                                         | 11,118                      | 62,906                                             | 29,124                          | 0,001                                               | 21,345                            | 78,737                                                   | 68,715                                | 61,948                                                                          |
| 4  | 58,845                                         | 29,020                      | 6,768                                              | 6,400                           | 3,722                                               | 6,883                             | 50,533                                                   | 85,853                                | 65,611                                                                          |
| 5  | 58,775                                         | 45,360                      | 20,873                                             | 31,445                          | 46,888                                              | 42,871                            | 52,530                                                   | 54,498                                | 71,674                                                                          |
| 6  | 60,002                                         | 59,561                      | 48,942                                             | 0,460                           | 43,562                                              | 0,020                             | 66,430                                                   | 30,460                                | 44,508                                                                          |
| 7  | 62,793                                         | 40,557                      | 45,586                                             | 7,815                           | 29,940                                              | 11,124                            | 63,631                                                   | 26,999                                | 60,752                                                                          |
| 8  | 60,369                                         | 48,715                      | 37,657                                             | 0,657                           | 31,107                                              | 15,362                            | 12,629                                                   | 50,718                                | 50,820                                                                          |
| 9  | 72,912                                         | 19,776                      | 49,257                                             | 3,552                           | 46,155                                              | 32,034                            | 49,773                                                   | 21,121                                | 68,236                                                                          |
| 10 | 64,355                                         | 69,390                      | 50,672                                             | 17,063                          | 27,445                                              | 18,025                            | 50,566                                                   | 38,251                                | 63,730                                                                          |
| 11 | 48,519                                         | 36,176                      | 45,721                                             | 6,184                           | 48,066                                              | 45,376                            | 22,229                                                   | 58,500                                | 37,169                                                                          |
| 12 | 65,840                                         | 40,275                      | 46,983                                             | 19,630                          | 39,331                                              | 35,489                            | 29,428                                                   | 55,239                                | 66,965                                                                          |
| 13 | 60,395                                         | 44,058                      | 61,656                                             | 5,545                           | 55,884                                              | 44,081                            | 80,910                                                   | 26,917                                | 48,671                                                                          |
| 14 | 75,498                                         | 51,503                      | 58,961                                             | 26,785                          | 16,188                                              | 0,056                             | 0,770                                                    | 49,792                                | 64,688                                                                          |
| 15 | 60,854                                         | 51,988                      | 31,526                                             | 62,682                          | 35,975                                              | 18,897                            | 35,965                                                   | 50,510                                | 60,003                                                                          |
| 16 | 50,728                                         | 41,447                      | 58,215                                             | 35,610                          | 34,750                                              | 59,237                            | 59,434                                                   | 34,525                                | 69,080                                                                          |
| 17 | 68,022                                         | 47,541                      | 52,094                                             | 18,986                          | 28,170                                              | 50,464                            | 43,779                                                   | 54,319                                | 65,704                                                                          |
| 18 | 65,889                                         | 18,320                      | 36,770                                             | 32,710                          | 29,428                                              | 6,755                             | 44,589                                                   | 56,182                                | 60,421                                                                          |
| 19 | 74,452                                         | 27,054                      | 44,725                                             | 6,766                           | 33,651                                              | 29,597                            | 66,267                                                   | 27,039                                | 62,391                                                                          |
| 20 | 82,832                                         | 61,305                      | 30,922                                             | 53,088                          | 28,980                                              | 55,016                            | 62,232                                                   | 21,461                                | 58,668                                                                          |
| 21 | 60,413                                         | 34,690                      | 59,141                                             | 30,847                          | 44,572                                              | 31,009                            | 22,984                                                   | 30,653                                | 64,576                                                                          |
| 22 | 79,620                                         | 11,112                      | 41,996                                             | 4,994                           | 15,847                                              | 15,340                            | 54,008                                                   | 26,639                                | 40,552                                                                          |
| 23 | 69,589                                         | 53,238                      | 58,011                                             | 12,649                          | 22,355                                              | 0,121                             | 47,078                                                   | 60,056                                | 46,597                                                                          |
| 24 | 13,024                                         | 54,110                      | 63,153                                             | 28,891                          | 14,270                                              | 38,261                            | 39,004                                                   | 17,421                                | 51,047                                                                          |
| 25 | 74,064                                         | 1,681                       | 52                                                 | 41,317                          | 53,238                                              | 76,198                            | 32,876                                                   | 23,325                                | 46,837                                                                          |
| 26 | 56,728                                         | 18,672                      | 17,797                                             | 29,807                          | 27,730                                              | 14,518                            | 52,490                                                   | 30,528                                | 8,168                                                                           |
| 27 | 83,949                                         | 25,717                      | 42,812                                             | 38,722                          | 43,765                                              | 0,013                             | 41,135                                                   |                                       | 72,847                                                                          |
| 28 | 58,875                                         | 26,193                      | 42,827                                             | 20,181                          | 42,829                                              | 9,574                             | 67,345                                                   |                                       | 83,698                                                                          |
| 29 | 47,798                                         | 27,290                      | 32,599                                             | 13,103                          | 22,010                                              | 27,401                            | 76,164                                                   |                                       | 61,323                                                                          |
| 30 | 59,661                                         | 29,803                      | 37,725                                             | 29,766                          | 33,083                                              | 39,538                            | 36,494                                                   |                                       | 49,891                                                                          |
| 31 | 70,296                                         | 30,659                      | 30,377                                             | 34,100                          | 42,377                                              | 44,466                            | 54,863                                                   |                                       | 42,047                                                                          |
| 32 | 71,781                                         | 31,223                      | 42,03                                              | 48,012                          | 32,322                                              | 13,541                            | 38,307                                                   |                                       | 44,872                                                                          |
| 33 | 73,120                                         | 36,296                      | 66,278                                             | 29,044                          | 7,331                                               | 5,802                             | 5,937                                                    |                                       | 84,344                                                                          |
| 34 | 16,730                                         | 39,272                      | 38,074                                             | 29,627                          | 38,489                                              | 0,002                             | 41,638                                                   |                                       | 58,345                                                                          |

|    |        |        |        |        |        |        |        |        |
|----|--------|--------|--------|--------|--------|--------|--------|--------|
| 35 | 72,822 | 39,470 | 37,537 | 27,753 | 32,567 | 18,156 | 42,744 | 35,401 |
| 36 | 68,139 | 39,725 | 40,153 | 40,927 | 42,262 | 11,137 | 23,163 | 43,095 |
| 37 | 54,581 | 42,403 | 33,378 | 26,872 | 49,840 | 28,540 | 44,514 | 53,711 |
| 38 | 58,121 | 43,195 | 39,417 | 12,595 | 31,618 | 25,975 | 35,814 | 76,933 |
| 39 | 58,181 | 51,311 | 45,425 | 0,216  | 42,010 | 19,354 | 40,634 | 83,028 |
| 40 | 60,073 | 56,424 | 43,707 | 62,664 | 43,022 | 22,592 | 54,137 | 45,035 |
| 41 | 67,999 | 57,708 | 44,968 | 37,652 | 32,400 | 8,565  | 0,402  | 52,277 |
| 42 | 54,339 | 67,409 | 63,141 |        |        | 10,768 | 42,100 | 47,050 |
| 43 | 56,480 | 3,183  | 43,746 |        |        | 15,957 | 53,665 | 63,225 |
| 44 | 61,619 | 36,000 | 40,506 |        |        | 10,360 | 49,973 | 69,217 |
| 45 | 64,586 | 35,082 | 64,047 |        |        | 69,734 | 0,051  | 45,232 |
| 46 | 56,109 | 28,506 | 32,886 |        |        | 16,491 | 29,711 | 62,568 |
| 47 | 75,318 | 2,734  | 47,719 |        |        | 7,577  | 66,308 | 24,518 |
| 48 | 52,103 | 38,635 | 42,428 |        |        | 23,653 | 45,687 | 55,823 |
| 49 | 77,502 | 46,918 | 10,251 |        |        | 18,014 | 46,263 | 73,827 |
| 50 | 63,058 | 0,775  | 37,867 |        |        | 36,817 | 55,820 | 48,960 |
| 51 | 55,567 | 47,637 | 35,081 |        |        | 37,153 | 45,606 | 71,032 |
| 52 | 66,610 | 49,460 | 50,431 |        |        | 7,532  | 42,851 | 54,389 |
| 53 | 53,867 | 49,720 | 40,501 |        |        |        | 70,679 | 47,204 |
| 54 | 51,437 | 61,996 | 53,52  |        |        |        | 57,559 | 49,716 |
| 55 | 65,312 | 20,230 | 52,541 |        |        |        | 25,155 | 80,095 |
| 56 | 70,740 | 15,836 | 48,775 |        |        |        |        |        |
| 57 | 48,217 | 38,242 | 18,157 |        |        |        |        |        |
| 58 | 58,268 | 0,068  | 38,04  |        |        |        |        |        |
| 59 | 65,264 | 26,268 | 51,181 |        |        |        |        |        |
| 60 | 48,887 | 31,732 | 48,387 |        |        |        |        |        |
| 61 | 61,216 | 0,919  | 43,896 |        |        |        |        |        |
| 62 | 66,240 | 15,928 | 40,561 |        |        |        |        |        |
| 63 | 45,598 | 33,877 | 24,745 |        |        |        |        |        |
| 64 | 69,509 | 59,306 | 14,63  |        |        |        |        |        |
| 65 | 93,091 | 0,541  | 27,696 |        |        |        |        |        |
| 66 | 59,542 | 9,136  | 21,294 |        |        |        |        |        |
| 67 | 60,517 | 4,276  | 39,524 |        |        |        |        |        |
| 68 | 71,822 | 16,411 | 68,043 |        |        |        |        |        |
| 69 | 64,274 | 17,824 | 49,478 |        |        |        |        |        |
| 70 | 67,137 | 33,616 | 44,251 |        |        |        |        |        |
| 71 | 53,646 | 45,420 | 44,21  |        |        |        |        |        |
| 72 | 62,328 | 45,760 | 48,204 |        |        |        |        |        |
| 73 | 75,883 | 26,202 | 71,378 |        |        |        |        |        |

|     |        |        |        |
|-----|--------|--------|--------|
| 74  | 70,338 | 28,096 | 43,206 |
| 75  | 68,865 | 48,563 | 42,18  |
| 76  | 68,557 | 28,488 | 76,428 |
| 77  | 67,372 | 47,711 | 33,966 |
| 78  | 67,127 | 26,557 |        |
| 79  | 65,744 | 30,373 |        |
| 80  | 65,571 | 34,927 |        |
| 81  | 65,375 | 25,396 |        |
| 82  | 64,829 | 24,100 |        |
| 83  | 61,133 | 43,964 |        |
| 84  | 60,768 | 27,454 |        |
| 85  | 57,998 | 44,971 |        |
| 86  | 56,956 | 22,152 |        |
| 87  | 54,117 | 42,108 |        |
| 88  | 53,566 | 38,915 |        |
| 89  | 51,875 | 33,208 |        |
| 90  | 49,819 | 36,842 |        |
| 100 | 48,652 | 23,845 |        |
| 101 | 50,683 | 31,158 |        |
| 102 | 77,589 | 10,862 |        |
| 103 | 51,687 | 0,018  |        |
| 104 | 63,411 | 29,426 |        |
| 105 | 64,552 | 37,932 |        |
| 106 | 45,910 | 36,187 |        |
| 107 | 43,992 | 6,714  |        |
| 108 | 65,040 | 24,739 |        |
| 109 | 82,276 | 30,469 |        |
| 110 | 83,382 | 26,549 |        |
| 111 | 58,617 | 8,79   |        |
| 112 | 34,942 | 55,674 |        |
| 113 | 51,522 | 22,083 |        |
| 114 | 63,192 | 38,312 |        |
| 115 | 38,038 | 37,418 |        |
| 116 | 67,590 | 51,857 |        |
| 117 | 80,815 | 31,811 |        |
| 118 | 82,619 | 25,885 |        |
| 119 | 35,145 | 27,717 |        |
| 120 | 81,160 | 42,72  |        |
| 121 | 75,965 | 40,681 |        |

|     |        |
|-----|--------|
| 122 | 38,627 |
| 123 | 20,302 |
| 124 | 20,212 |

Integrated density (ID) of in situ hybridization signal within *XBF1* expression domains of stage 26 *Xenopus laevis* embryos measured in arbitrary units by ImageJ image processing program (<http://rsb.info.nih.gov/ij/index.html>) and photographed at a constant light and exposition conditions by Leica M205 fluorescent stereomicroscope. For each type of injections, the data were collected from three to five independent experiments. Each series of experiments (experiments carried out in 1 day on the eggs obtained from the same pair of frogs) included control embryos, the antiNoggin2 MO-injected embryos and embryos injected by the MO mixed with different combinations of plasmids (from two to five combinations in different series of experiments). No significant difference (exciding 1%) between mean IDs of control embryos obtained in the same day from the same pair of frogs but processed for in situ hybridization in different vials were detected. Nevertheless, in each series of experiments, about 10 control embryos non-labeled by FLD were processed in the same vial with embryos injected by antiNoggin2 MO for to control possible difference between the in situ hybridization conditions. However, in neither of case was a significant difference revealed between these and the control embryos (labeled by FLD), which was processed separately. On the other hand, up to 15% difference in mean IDs was detected between control embryos from different series of experiments (obtained in different days from different pairs of frogs). Therefore, to normalize the results of different series of experiments, the data obtained in different days were normalized using the following procedure: (1) mean values of the *XBF1* expression area in control embryos were calculated for each series of experiments; (2) one of these control mean values was chosen (arbitrary) as a standard and the correction coefficients in respect to this standard were calculated for each of all the other control mean values; (3) IDs of all individual embryos in all series of experiments were normalized by using the corresponding correction coefficients.
